# Supplementary material for: Detection of multiply charged protein ions using matrix-assisted laser desorption/ionization mass spectrometry and a force-dried droplet method with a 2-nitrophloroglucinol matrix
Source: Royal Society of Chemistry journal article supplement (doi:10.1039/d1an02114a), 2022-01-01
Supplement: d1an02114a1.pdf [file d1an02114a1.pdf]

Table S1. Comparison of laser intensity and relative standard deviation (RSD) values for matrix-assisted laser desorption/ionization time-of-flight mass spectrometry (MALDI-TOF MS) analyses of myoglobin and cytochrome *c* sample spots prepared using the forced dried droplet (FDD) method with a 2-nitrophenylglycinol (2-NPG) matrix containing HCl as an additive, with and without MALDI plate scratching.

| Protein sample      | FDD method         | Spot number | Average | Standard deviation | RSD(%) | Average of RSD(%) | Spot image                                                                            |
|---------------------|--------------------|-------------|---------|--------------------|--------|-------------------|---------------------------------------------------------------------------------------|
| Myoglobin           | Without scratching | 1           | 4927.1  | 1621.0             | 32.9   | 30.7              |    |
|                     |                    | 2           | 4633.3  | 1322.2             | 28.5   |                   |    |
|                     | With scratching    | 1           | 3416.3  | 1333.3             | 39.0   | 32.6              |   |
|                     |                    | 2           | 5496.7  | 1444.0             | 26.3   |                   |  |
| Cytochrome <i>c</i> | Without scratching | 1           | 13201.4 | 6259.0             | 47.4   | 45.4              |  |
|                     |                    | 2           | 6296.3  | 2728.6             | 43.3   |                   |  |
|                     | With scratching    | 1           | 6127.9  | 2038.9             | 33.3   | 27.4              |  |
|                     |                    | 2           | 8499.9  | 1826.9             | 21.5   |                   |  |

Table S2. Comparison of charge state distributions obtained from MALDI-TOF MS analyses of myoglobin and cytochrome *c* sample spots prepared using the FDD method with a 2-NPG matrix containing HCl as an additive, with and without scratching.

| Sample              | Preparation method | Charge state | Spot number |        | Sum     | Ratio of charged ion (%) |
|---------------------|--------------------|--------------|-------------|--------|---------|--------------------------|
|                     |                    |              | 1           | 2      |         |                          |
| myoglobin           | Without scratching | +1           | 2522.7      | 1842.8 | 4365.5  | 45.7                     |
|                     |                    | +2           | 1914.5      | 2034.9 | 3949.4  | 41.3                     |
|                     |                    | +3           | 491.9       | 755.6  | 1247.5  | 13.0                     |
|                     |                    | Sum          | 4929.1      | 4633.3 | 9562.4  |                          |
|                     | With scratching    | +1           | 754.5       | 1882.9 | 2637.5  | 29.6                     |
|                     |                    | +2           | 1694.2      | 2605.6 | 4299.8  | 48.2                     |
|                     |                    | +3           | 967.6       | 1008.2 | 1975.8  | 22.2                     |
|                     |                    | Sum          | 3416.3      | 5496.7 | 8913.1  |                          |
| cytochrome <i>c</i> | Without scratching | +1           | 4585.4      | 1812.5 | 6397.9  | 32.8                     |
|                     |                    | +2           | 6212.2      | 3153.9 | 9366.1  | 48.0                     |
|                     |                    | +3           | 2403.8      | 1329.9 | 3733.7  | 19.2                     |
|                     |                    | Sum          | 13201.4     | 6296.3 | 19497.7 |                          |
|                     | With scratching    | +1           | 1571.1      | 2402.8 | 3793.9  | 27.2                     |
|                     |                    | +2           | 3199.4      | 4305.0 | 7504.4  | 51.3                     |
|                     |                    | +3           | 1357.4      | 1792.1 | 3149.5  | 21.5                     |
|                     |                    | Sum          | 6127.9      | 8499.9 | 14627.9 |                          |
